# Supplementary material
Source: publisher figshare collection journal article supplement (https://gsajournals.figshare.com/ndownloader/files/12404663)
Supplement: Supplementary file 1 [file 12404663]

## Sheet: Sheet1
TableS4
Gene	Driver	Hatchability	Stage1	Stage2	Stage3	Post stage 4	n	p*	stage of arrest	phenotype description
TER94	matαtub-Gal-VP16	0	0.0952381	0.857143	0.047619	0	21	5.96362e-11	stage 2	multi-polar spindles; supernumerary centrosomes; abnormal chromosomes
shot	matαtub-Gal-VP16	0	0.04	0.15	0.04	0.78	27	0.275667	post stage 3	no apparent abnormalities in stage 1-3 embryos
Dlig-I	matαtub-Gal-VP16	0	0.833333	0.166667	0	0	36	1.20111e-16	stage 1	abnormal chromosome (27% embryos)
mcm3	matαtub-Gal-VP16	0	0.8	0.2	0	0	25	1.04145e-13	stage 1	abnormal chromosomes
spindly	matαtub-Gal-VP16	0	0.538462	0.384615	0	0.0769231	26	1.73564e-11	stage 1-2	abnormal spindle morphology; acentrosomal spindles.
spc105r	matαtub-Gal-VP16	0	0.911765	0.0882353	0	0	34	3.37928e-16	stage 1	abnormal chromosomes, aggregation of DNA
ball	matαtub-Gal-VP16	0	0.892857	0.107143	0	0	28	1.40845e-14	stage 1	abnormal chromosomes
14-3-3e	matαtub-Gal-VP16	0	0.142857	0.857143	0	0	21	2.25734e-12	stage 2	abnormal chromosomes and aggregation of microtubules, abnormal spindle morphology
RPA2	matαtub-Gal-VP16	0.013	0.130435	0.130435	0.347826	0.391304	23	0.115166	stage 2-3	chromosome aggregation, abnormal chromosome and spindle association
CG9556	matαtub-Gal-VP16	0.0812	0.0363636	0.218182	0.218182	0.527273	55	0.0588612	post stage 3	abnormal migration of nuclei in some stage 2-3 embryos
pzg	matαtub-Gal-VP16	0.1	0.0454545	0.909091	0	0.0454545	22	2.63356e-11	stage 2	abnormal cell cycle synchronization, abnormal chromosome morphology, acentrosomal spindles.
spag	matαtub-Gal-VP16	0.143	0.125	0.194444	0.208333	0.472222	72	0.00957215	stage 1-3	acentrosomal spindles.
BRWD3	matαtub-Gal-VP16	0.143	0.383333	0.133333	0.216667	0.266667	60	1.34832e-05	stage1-2	abnormal chromosome morphology
D1	matαtub-Gal-VP16	0.24	0.148148	0.148148	0.333333	0.37037	27	0.0540304	stage 1-5	mostly post stage 3 arrest; abnormal chromosome morphology.
inaD	matαtub-Gal-VP16	0.374	0.0833333	0.0416667	0.208333	0.666667	24	0.578487	post stage 3	no apparent abnormalities in stage 1-3 embryos
Mbs	matαtub-Gal-VP16	0	0.4	0.4	0.133333	0.0666667	30	3.41356e-09	stage 1-2	abnormal spindles, acentrosomal spindles.
Su(var)205	matαtub-Gal-VP16	0.487	0.133333	0.4	0.0666667	0.4	15	0.00215882	stage 2	abnormal chromosome segregation, abnormal spindle morphology, acentrosomal spindles.
AttP2	matαtub-Gal-VP16	1	0.0731707	0.0243902	0.0487805	0.853659	41	NA
Bre1	matαtub-Gal-VP16	0	0.428571	0.285714	0.257143	0.0285714	35	4.63014e-09	stage 1-3	abnormal chromosome; abnormal spindle morphology; acentrosomal spindles.
Nipped-B	MTD-Gal4	0	0.116279	0.139535	0.209302	0.534884	43	0.038689	stage 1-5	absence of centrosomes from spindle poles in some early arrest embryos
mrityu	MTD-Gal4	0	0.870968	0.129032	0	0	31	1.20111e-16	stage 1-2	absence of centrosomes from spindle poles in some early arrest embryos
PyK	MTD-Gal4	0	0.458333	0.520833	0.0208333	0	48	8.05354e-20	stage 1-2	likely meiotic arrest, absence of centrosomes from spindle poles in many embryos, abnormal chromosomes
alpha-adaptin	MTD-Gal4	0	0.0444444	0.0444444	0.111111	0.8	45	0.648158	stage 3-4	Abnormal centrosome activity
myopic	MTD-Gal4	0	0.180328	0.0819672	0.409836	0.327869	61	0.0222265	stage 3	Abnormal centrosome activity
mod(mdg4)	MTD-Gal4	0	0.576923	0.423077	0	0	26	3.1799e-15	stage 1	abnormal chromosomes, abnormal spindle morphology, acentrosomal spindles.
aub	MTD-Gal4	0	0.678571	0.321429	0	0	28	6.64097e-16	stage1-early stage 2	abnormal chromosome morphology, abnormal spindle morphology, asynchronized cell cycle in some embryos
eco	MTD-Gal4	0	0.0416667	0.625	0.125	0.208333	37	1.83619e-08	stage 2-4	abnormal chromosome morphology; Abnormal centrosome activity
sle	MTD-Gal4	0	0.296296	0.666667	0.037037	0	27	3.4456e-14	stage 2	multi-polar spindles; abnormal centrosome aggregations; abnormal chromosome morphology.
Vps2	MTD-Gal4	0	0	0.166667	0.375	0.458333	24	0.3087	post stage 3	abnormal migration of nuclei in late stage 2 embryos, abnormal centrosomes aggregations in stage 3-4 embryos
MCPH1	MTD-Gal4	0	0.130435	0.869565	0	0	23	3.4456e-14	stage 2	abnormal chromosomes.
αTub67C	MTD-Gal4	0.056	0.96	0	0	0.04	25	1.66563e-13	stage 1	arrest in metaphase of first mitosis with abnormal spindle structure.
axin	MTD-Gal4	0	0.04	0	0.2	0.76	25	0.886001	post stage 3	no apparent abnormalities in stage 1-4 embryos.
ana1	MTD-Gal4	0	0	1	0	0	20	4.57889e-13	stage 2	acentrosomal spindles; abnormal spindle structure; abnormal chromosome morphology.
msn	MTD-Gal4	0	0.103448	0.0344828	0.206897	0.655172	29	0.415931	post stage 3	no apparent abnormalities in stage 1-4 embryos.
Acn	MTD-Gal4	0.0109	0.357143	0.285714	0.214286	0.142857	28	7.36648e-07	stage 1-3	Embryos small in size; abnormal spindle morphology; acentrosomal spindles in some embryos.
Pk92B	MTD-Gal4	0.063	0.151515	0.424242	0.242424	0.181818	33	3.40836e-06	early stage 2	abnormal chromosomes, acentrosomal spindles in some embryos.
CG32088	MTD-Gal4	0.114	0.12	0.16	0.36	0.36	25	0.0463375	mostly stage 3	No apparent abnormalities in early embryos.
modulo	MTD-Gal4	0.185	0.24	0.24	0.07	0.45	55	1.58446e-05	stage 1-2	embryos small in size; abnormal chromosome morphology, acentrosomal spindles.
rec	MTD-Gal4	0.281	0.0757576	0.181818	0.0757576	0.666667	66	0.0224301	mostly post stage 3	no apparent abnormalities in stage 1-4 embryos
Plutonium	MTD-Gal4	0.393	0.285714	0.714286	0	0	21	1.79727e-13	stage 2	aggregation of DNA; abnormal chromosome morphology
CG8223	MTD-Gal4	0.467	0.0909091	0.606061	0.030303	0.272727	33	1.83619e-08	stage 2	Abnormal chromosome morphology.
NUCB1	MTD-Gal4	0.343	0.0243902	0.0731707	0.341463	0.560976	41	0.603458	post stage 3	no apparent abnormalities in stage 1-4 embryos; likely arrest post stage 4
Akap200	MTD-Gal4	0.355	0.0526316	0.0789474	0.473684	0.394737	38	0.415931	post stage 3	no apparent abnormalities in stage 1-4 embryos
CG3689	MTD-Gal4	0.304	0.208333	0.395833	0.0625	0.333333	48	8.62863e-08	early stage 2	multi-polar spindles; supernumerary centrosomes.
AttP2	MTD-Gal4	1	0.0416667	0.0416667	0.104167	0.8125	48	NA	Control
Table S4. Summary of developmental arrest phenotypes in the embryos produced by maternal knockdown of 43 genes (hatchability <= 50%).
*p is the significance of the proportion of embryos that arrest in stage 1 and 2 of embryogenesis compare to that in the AttP2 control.
